# Supplementary material for: Comparative Efficacy and Safety of Dexmedetomidine and Esmolol in Functional Endoscopic Sinus Surgery (FESS): A Systematic Review and Meta-analysis
Source: Research Square preprint supplement (doi:10.21203/rs.3.rs-8501577/v1), 2026-01-16
Supplement: Supplementary file 2 [file b403f4fca43119bbb98a9610.docx]

**Table 2: Summary Of Findings (SoF) Table**

| **Outcome**  **№ of participants**  **(studies)** | **Study design** | **Effect measure**  **(95% CI)** | **Certainty** |
| --- | --- | --- | --- |
| Intraoperative blood loss (mL)  306 participants  5 studies | RCTs | **MD -1.18 mL**  [-2.99 to 0.63] | ⨁⨁◯◯  Lowa,b |
| Emergence time (minutes)  586 participants  10 studies | RCTs | **MD 3.13 minutes**  [2.64 to 3.63] | ⨁⨁◯◯  Lowa,c |
| Time to first rescue analgesia (minutes)  536 participants  9 studies | RCTs | **MD 27.83 minutes**  [26.41 to 29.26] | ⨁⨁⨁◯  Moderatea |
| Time to modified Aldrete score >9 (minutes)  316 participants  6 studies | RCTs | **MD 2.68 minutes**  [2.26 to 3.11] | ⨁⨁◯◯  Lowa,b |
| Incidence of hypotension  100 participants  2 studies | RCTs | **RR 0.20**  [0.02 to 1.65] | ⨁⨁◯◯  Lowa,b |
| Incidence of bradycardia  100 participants  2 studies | RCTs | **RR 3.96**  [1.62 to 9.65] | ⨁⨁◯◯  Lowa,d |
| Incidence of postoperative nausea and vomiting  220 participants  3 studies | RCTs | **RR 0.26**  [0.10 to 0.73] | ⨁⨁◯◯  Lowa,d |
| **CI:** confidence interval; **MD:** mean difference; **RR:** risk ratio; **RCTs:** randomized controlled trials; **№:** number | | | |
| **GRADE Working Group grades of evidence** **High certainty:** we are very confident that the true effect lies close to that of the estimate of the effect. **Moderate certainty:** we are moderately confident in the effect estimate: the true effect is likely to be close to the estimate of the effect, but there is a possibility that it is substantially different. **Low certainty:** our confidence in the effect estimate is limited: the true effect may be substantially different from the estimate of the effect. **Very low certainty:** we have very little confidence in the effect estimate: the true effect is likely to be substantially different from the estimate of effect. | | | |

**Comments:**

a Downgraded for risk of bias

b Downgraded for imprecision (wide CIs indicate the possibility of arriving at two conclusions viz. clinically meaningful effect and no clinically meaningful effect)

c Downgraded for heterogeneity

d Downgraded for imprecision (sparse event data)
