# Supplementary material for: Comparative Efficacy and Safety of Dexmedetomidine and Esmolol in Functional Endoscopic Sinus Surgery (FESS): A Systematic Review and Meta-analysis
Source: Research Square preprint supplement (doi:10.21203/rs.3.rs-8501577/v1), 2026-01-16
Supplement: Supplementary file 3 [file d40d84810efe3367b4a8ed12.docx]

**Table 1:** Table summarizing key characteristics of the included studies

| **Study Characteristics** | | | | | |  | **Drug Details** | | | | |  | **Patient Demographics** | | | | | | | | | | | | | | | |
| --- | --- | --- | --- | --- | --- | --- | --- | --- | --- | --- | --- | --- | --- | --- | --- | --- | --- | --- | --- | --- | --- | --- | --- | --- | --- | --- | --- | --- |
| **Author** | **Year** | **Country** | **Center** | **Study Design** | **Sample Size** | **Drug Name** | **Route** | **Time (Duration)** | **Dosage** | **Dosage Form** | **Age** | | **Weight** | | **BMI** | | **ASA Status** | | | | **Baseline Heart Rate (bpm)** | | **Baseline Mean Arterial Pressure (mmHg)** | | **Gender** | |
|  | | | | | |  | | | | | Mean (years) | SD | Mean (kg) | SD | Mean (kg/m2) | SD | I | II | III | IV | Mean (bpm) | SD | Mean (mm Hg) | SD | Males (n) | Males (%) |
| Ahmad et al. [13] | 2025 | India | Single | RCT | 30 | DEX | IV | Loading dose: 10 minutes Maintenance dose: per hour | Loading dose: 1 μ/kg Maintenance dose: 0.4 to 0.8 μg/kg/hr | Infusion | 31.6 | 4.1 | 55.7 | 3.8 | N/R | N/R | 12 | 18 | N/R | N/R | 72.5 | 5 | 120.5 | 8 | 21 | 70% |
| 30 | ESM | IV | Loading dose: 1 minute Maintenance dose: per hour | Loading dose: 1 mg/kg Maintenance dose: 0.5 mg/kg/hr | Infusion | 30.1 | 5.2 | 54.6 | 3.9 | N/R | N/R | 14 | 16 | N/R | N/R | 71.5 | 5.1 | 117.5 | 8.1 | 16 | 53.30% |
| Bajwa et al. [14] | 2016 | India | Single | RCT | 50 | DEX | IV | Loading dose: 10 minutes Maintenance dose: per hour | Loading dose: 1 μg/kg Maintenance dose: 0.5-1.0 μg/kg/hr | Infusion | 31.6 | 5.2 | N/R | N/R | 28.4 | 1.7 | 39 | 11 | N/R | N/R | 75.6 | 8.3 | 95.6 | 8.2 | 31 | 62% |
| 50 | ESM | IV | Loading dose: 1 minute Maintenance dose: per hour | Loading dose: 1 mg/kg Maintenance dose: 0.5-1.0 mg/kg/hr | Infusion | 34.3 | 5.6 | N/R | N/R | 26.9 | 2.1 | 33 | 17 | N/R | N/R | 76.4 | 7.5 | 97.8 | 10.6 | 38 | 76% |
| Damarla et al. [15] | 2022 | India | Single | RCT | 40 | DEX | IV | Loading dose: 10 minutes Maintenance dose: per hour | Loading dose: 1 μg/kg Maintenance dose: 0.4-0.8 μg/kg/hr | Infusion | 29.24 | 1.38 | 64.04 | 8.78 | 23.04 | 1.13 | 24 | 16 | N/R | N/R | 80.23 | 4.63 | 81.23 | 2.45 | N/R | N/R |
| 40 | ESM | IV | Loading dose: 1 minute Maintenance dose: per hour | Loading dose: 1 mg/kg Maintenance dose: 0.5 mg/kg/hr | Infusion | 29.45 | 2.51 | 63.98 | 6.53 | 22.89 | 1.88 | 22 | 18 | N/R | N/R | 82.33 | 6.1 | 83.42 | 2.69 | N/R | N/R |
| Geetanjali et al. [16] | 2024 | India | Single | RCT | 20 | DEX | IV | N/R | Loading dose: 0.5 μg/kg Maintenance dose: N/R | Infusion | 36 | 12.13 | N/R | N/R | N/R | N/R | Present | Present | N/R | N/R | 79.85 | 5.83 | 90.05 | 3.8 | 7 | 35% |
| 20 | ESM | IV | N/R | Loading dose: 0.75 mg/kg Maintenance dose: N/R | Infusion | 36.5 | 12.79 | N/R | N/R | N/R | N/R | Present | Present | N/R | N/R | 79.55 | 6.28 | 89.3 | 9.25 | 14 | 70% |
| Joshi et al. [17] | 2023 | India | Single | RCT | 33 | DEX | IV | Loading dose: 10 minutes Maintenance dose: per hour | Loading dose: 1 μg/kg Maintenance dose: 0.4-0.8 μg/kg/hr | Infusion | N/R | N/R | N/R | N/R | N/R | N/R | 19 | 14 | N/R | N/R | N/R | N/R | N/R | N/R | 27 | 81.81% |
| 33 | ESM | IV | Loading dose: 1 minute Maintenance dose: per hour | Loading dose: 1 mg/kg Maintenance dose: 0.4-0.8 mg/kg/hr | Infusion | N/R | N/R | N/R | N/R | N/R | N/R | 12 | 11 | N/R | N/R | N/R | N/R | N/R | N/R | 26 | 78.78% |
| Kakati et al. [18] | 2018 | India | Single | RCT | 20 | DEX | IV | Loading dose: 15 minutes Maintenance dose: per hour | Loading dose: 1 μg/kg Maintenance dose: 0.5 μg/kg/hr | Infusion | 31.6 | N/R | 55.7 | N/R | N/R | N/R | 20 | N/R | N/R | N/R | 84.95 | N/R | 96.6 | N/R | 10 | 50% |
| 20 | ESM | IV | Loading dose: 1 minute Maintenance dose: per hour | Loading dose: 1 mg/kg Maintenance dose: 0.5 mg/kg/hr | Infusion | 30.15 | N/R | 54.6 | N/R | N/R | N/R | 20 | N/R | N/R | N/R | 83.3 | N/R | 101.9 | N/R | 10 | 50% |
| Meghasree et al. [19] | 2024 | India | Single | RCT | 30 | DEX | IV | Loading dose: 10 minutes Maintenance dose: per hour | Loading dose: 1 μg/kg Maintenance dose: 0.4-0.8 μg/kg/hr | Infusion | N/R | N/R | N/R | N/R | N/R | N/R | Present | Present | N/R | N/R | N/R | N/R | 94.83 | 5.7 | N/R | N/R |
| 30 | ESM | IV | Loading dose: 1 minute Maintenance dose: per hour | Loading dose: 1 mg/kg Maintenance dose: 0.4-0.8 mg/kg/hr | Infusion | N/R | N/R | N/R | N/R | N/R | N/R | Present | Present | N/R | N/R | N/R | N/R | 94.87 | 5.78 | N/R | N/R |
| Omara et al. [20] | 2025 | Egypt | Single | RCT | 35 | DEX | IV | Loading dose: 10 minutes Maintenance dose: per hour | Loading dose: 1 μg/kg Maintenance dose: 0.5 μg/kg/hr | Infusion | 31.1 | 2.17 | N/R | N/R | 31.2 | 1.98 | Present | Present | N/R | N/R | N/R | N/R | N/R | N/R | 23 | 65.70% |
| 35 | ESM | IV | Loading dose: N/R Maintenance dose: per hour | Loading dose: 0.5 mg/kg Maintenance dose: 0.05 mg/kg/hr | Infusion | 32 | 2.04 | N/R | N/R | 30.7 | 3.28 | Present | Present | N/R | N/R | N/R | N/R | N/R | N/R | 22 | 62.90% |
| Kumar et al. [21] | 2024 | India | Single | RCT | 30 | DEX | IV | Loading dose: 10 minutes Maintenance dose: per hour | Loading dose: 1 μg/kg Maintenance dose: 0.4-0.8 μg/kg/hr | Infusion | 31.48 | 8.27 | N/R | N/R | N/R | N/R | 23 | 7 | N/R | N/R | 83.07 | 3.85 | 95.2 | 6.104 | N/R | N/R |
| 30 | ESM | IV | Loading dose: 10 minutes Maintenance dose: per hour | Loading dose: 1 mg/kg Maintenance dose: 0.3-0.5 mg/kg/hr | Infusion | N/R | N/R | N/R | N/R | 22 | 8 | N/R | N/R | 83.7 | 3.602 | 94.65 | 4.359 | N/R | N/R |
| Rather et al. [22] | 2015 | India | Single | RCT | 15 | DEX | IV | Loading dose: 10 minutes Maintenance dose: per hour | Loading dose: 1 μg/kg Maintenance dose: 0.4-0.8 μg/kg/hr | Infusion | 40.12 | 11.9 | 64.58 | 9.2 | N/R | N/R | 8 | 7 | N/R | N/R | 80.3 | 8.5 | 91.5 | 9.3 | 9 | 60% |
| 15 | ESM | IV | Loading dose: 1 minute Maintenance dose: per hour | Loading dose: 1 mg/kg Maintenance dose: 0.3-0.5 mg/kg/hr | Infusion | 39.12 | 12.77 | 60 | 8.95 | N/R | N/R | 7 | 8 | N/R | N/R | 81.6 | 8.9 | 90.7 | 9.2 | 7 | 46.70% |
| Ravikumar et al. [23] | 2017 | India | Single | RCT | 25 | DEX | IV | Loading dose: 10 minutes Maintenance dose: per hour | Loading dose: 1 μg/kg Maintenance dose: 0.4-0.8 μg/kg/hr | Infusion | 33.08 | 7.3 | 56 | 9.1 | N/R | N/R | 25 | N/R | N/R | N/R | 83.04 | N/R | N/R | N/R | N/R | N/R |
| 25 | ESM | IV | Loading dose: 1 minute Maintenance dose: per hour | Loading dose: 0.5 mg/kg Maintenance dose: 0.3-0.8 mg/kg/hr | Infusion | 31.84 | 8.6 | 57.04 | 9.7 | N/R | N/R | 25 | N/R | N/R | N/R | 87.52 | N/R | N/R | N/R | N/R | N/R |
| Sahu et al. [24] | 2021 | India | Single | RCT | 30 | DEX | IV | Loading dose: 10 minutes Maintenance dose: per hour | Loading dose: 1 μg/kg Maintenance dose: 0.4-0.8 μg/kg/hr | Infusion | N/R | N/R | N/R | N/R | N/R | N/R | Present | Present | N/R | N/R | 91.5 | 7.262 | 95.133 | 4.167 | 24 | 80% |
| 30 | ESM | IV | Loading dose: 1 minute Maintenance dose: per hour | Loading dose: 1 mg/kg Maintenance dose: 0.4-0.8 mg/kg/hr | Infusion | N/R | N/R | N/R | N/R | N/R | N/R | Present | Present | N/R | N/R | 93.133 | 4.167 | 94.333 | 5.3 | 26 | 88.67% |
| Shaheen et al. [25] | 2018 | Bangladesh | Single | RCT | 30 | DEX | IV | Loading dose: 10 minutes Maintenance dose: per hour | Loading dose: 1 μg/kg Maintenance dose: 0.4-0.8 μg/kg/hr | Infusion | 34.4 | 11.12 | 53.67 | 8.13 | N/R | N/R | 21 | 9 | N/R | N/R | 92.737 | N/R | 81.369 | N/R | 11 | 36.67% |
| 30 | ESM | IV | Loading dose: 1 minute Maintenance dose: per hour | Loading dose: 1 mg/kg Maintenance dose: 0.4-0.8 mg/kg/hr | Infusion | 36.2 | 12.55 | 52.3 | 9.44 | N/R | N/R | 20 | 10 | N/R | N/R | 90.474 | N/R | 82.619 | N/R | 12 | 40% |
| Shams et al. [26] | 2013 | Egypt | Single | RCT | 20 | DEX | IV | Loading dose: 10 minutes Maintenance dose: per hour | Loading dose: 1 μg/kg Maintenance dose: 0.4-0.8 μg/kg/hr | Infusion | 34.8 | 9.4 | 75.2 | 13.2 | N/R | N/R | 11 | 9 | N/R | N/R | 81.738 | N/R | 90.423 | N/R | N/R | N/R |
| 20 | ESM | IV | Loading dose: 1 minute Maintenance dose: per hour | Loading dose: 1 mg/kg Maintenance dose: 0.4-0.8 mg/kg/hr | Infusion | 36.1 | 8.8 | 73.5 | 11.9 | N/R | N/R | 10 | 10 | N/R | N/R | 81.987 | N/R | 92.394 | N/R | N/R | N/R |
| Sharma et al. [27] | 2025 | India | Single | RCT | 30 | DEX | IV | Loading dose: 10 minutes Maintenance dose: per hour | Loading dose: 1 μg/kg Maintenance dose: 0.5 μg/kg/hr | Infusion | 37.3 | 7.32 | 66.77 | 6.48 | N/R | N/R | Present | Present | N/R | N/R | 79.03 | 2.46 | 88.1 | 3.58 | 21 | 70% |
| 30 | ESM | IV | Loading dose: 1 minute Maintenance dose: per hour | Loading dose: 1 mg/kg Maintenance dose: 1 mg/kg/hr | Infusion | 37.43 | 5.21 | 68.67 | 7.99 | N/R | N/R | Present | Present | N/R | N/R | 80.3 | 3.09 | 86.97 | 3.74 | 20 | 66.67% |
| Shivakumara et al. [28] | 2018 | India | Single | RCT | 30 | DEX | IV | N/R | N/R | Infusion | 34.3 | 11.23 | 57.2 | 10.04 | N/R | N/R | Present | Present | N/R | N/R | 82.4 | 13.69 | 90.4 | 11.76 | 12 | 40% |
| 30 | ESM | IV | N/R | N/R | Infusion | 30.37 | 7.23 | 58.1 | 7.87 | N/R | N/R | Present | Present | N/R | N/R | 81.83 | 12.41 | 92.53 | 7.72 | 17 | 56.67% |
| Penta et al. [29] | 2025 | India | Single | RCT | 30 | DEX | IV | Loading dose: 10 minutes Maintenance dose: per hour | Loading dose: 1 μg/kg Maintenance dose: 0.5-1 μg/kg/h | Infusion | 33.6 | 9.6 | 58 | 6.1 | N/R | N/R | 24 | 6 | N/R | N/R | 80.5 | 3.5 | 86.3 | 5.9 | 15 | 50% |
| 30 | ESM | IV | Loading dose: 1 minute Maintenance dose: per hour | Loading dose: 1 mg/kg Maintenance dose: 0.5-1 mg/kg/h | Infusion | 32.3 | 8.6 | 59.7 | 6.9 | N/R | N/R | 27 | 3 | N/R | N/R | 75.5 | 9.2 | 92.5 | 4.4 | 24 | 80% |
| Vasavi et al. [30] | 2024 | India | Single | RCT | 30 | DEX | IV | Loading dose: 10 minutes Maintenance dose: per hour | Loading dose: 1 μg/kg Maintenance dose: 0.4-0.8 μg/kg/h | Infusion | 29.27 | 5.97 | 58.8 | 7.78 | N/R | N/R | 17 | 13 | N/R | N/R | 79.01 | N/R | 94.42 | N/R | 17 | 56.70% |
| 30 | ESM | IV | Loading dose: 10 minutes Maintenance dose: per hour | Loading dose: 1 mg/kg Maintenance dose: 0.4-0.8 mg/kg/h | Infusion | 29.97 | 5.14 | 53.73 | 9.18 | N/R | N/R | 15 | 15 | N/R | N/R | 80.27 | N/R | 94.68 | N/R | 16 | 53.30% |

BMI: Body Mass Index

SD: Standard Deviation

RCT: Randomized Controlled Trial

N/R: Not Reported

ESM: Esmolol

DEX: Dexmedetomidine

IV: Intravenous
